# Supplementary material for: Antioxidant, Redox, and Immunomodulatory Effects of Hypericum perforatum in the Galleria mellonella: A 3R-Oriented Invertebrate Model
Source: MDPI journal article supplement (doi:10.3390/biomedicines14061297), 2026-06-07
Supplement: s1 [file Supplementary Material S1.pdf › Supplementary Material S1.pdf]

# ESOGU-ARUM

Data File: 111858\_7  
Current Data Path: C:\Xcalibur\data\OKN  
Sample ID: 1  
Run Time(min): 57.02

Original Data Path: C:\Xcalibur\data\OKN  
Sample Type: Unknown  
Acquisition Date: 04/11/23 08:12:02 AM  
Vial: 18

Instrument Method: C:\Xcalibur\methods\xMED.meth  
Original Processing Method: C:\Xcalibur\methods\arum\_xx\_qual  
Current Processing Method: N/A

RT: 0.00 - 57.11

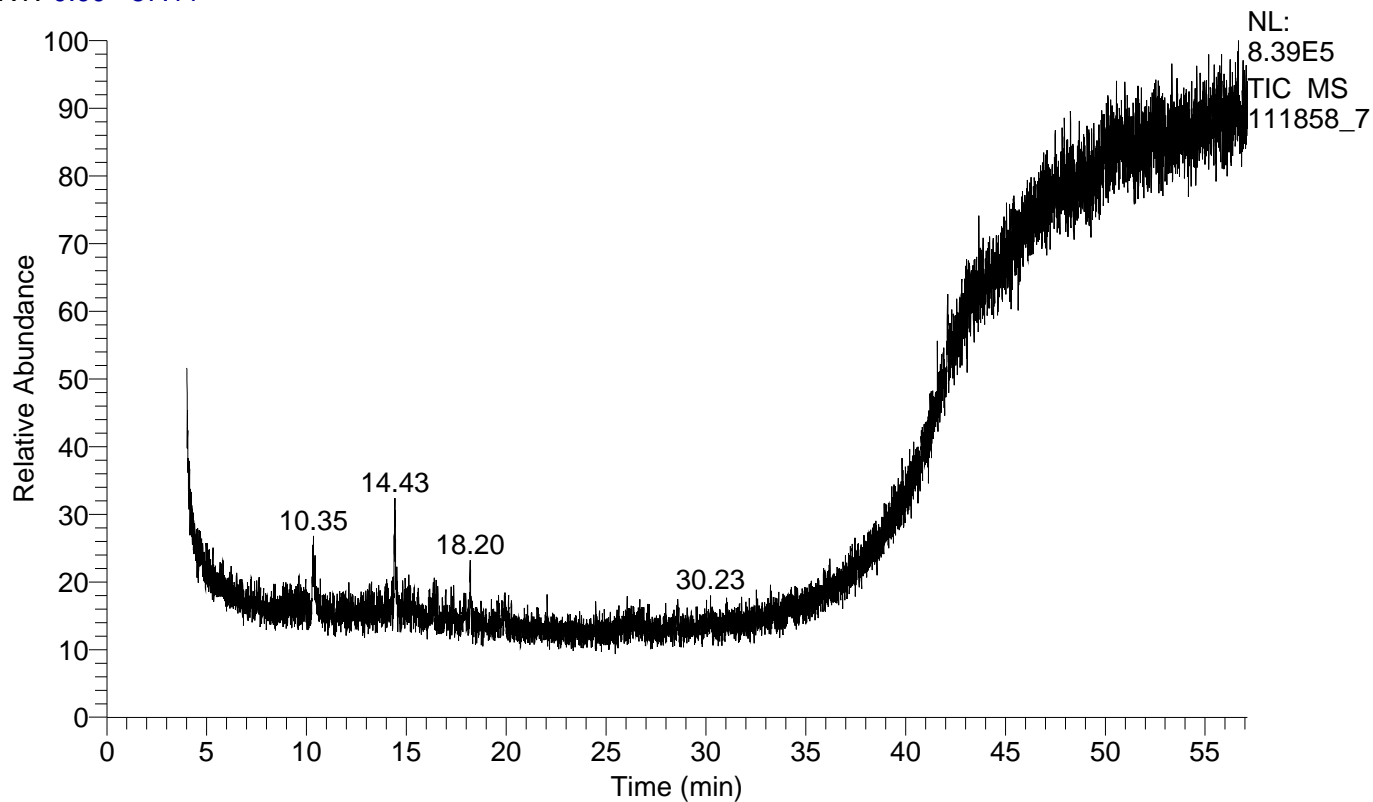

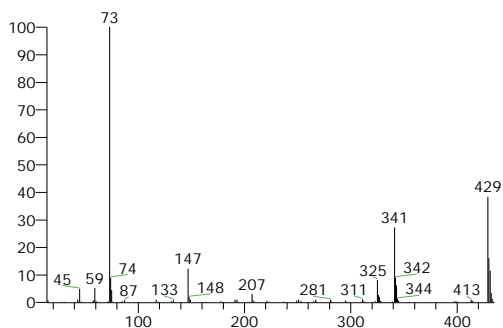

Cyclohexasiloxane, dodecamethyl-  
Formula C<sub>12</sub>H<sub>36</sub>O<sub>6</sub>Si<sub>6</sub>, MW 444, CAS# 540-97-6, Entry# 37894  
Dodecamethylcyclohexasiloxane

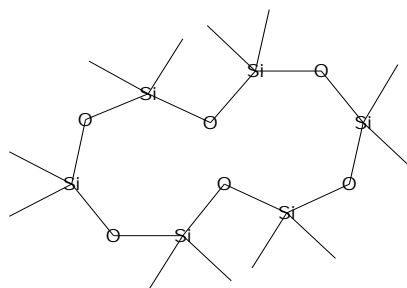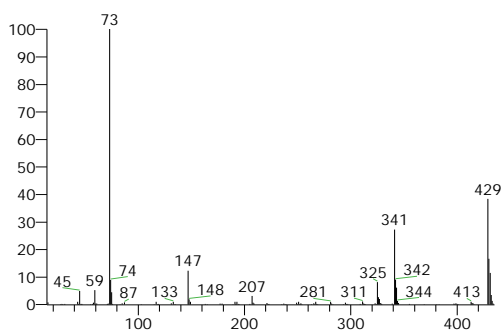

Cyclohexasiloxane, dodecamethyl- (CAS)  
Formula C<sub>12</sub>H<sub>36</sub>O<sub>6</sub>Si<sub>6</sub>, MW 444, CAS# 540-97-6, Entry# 584464  
Dodecamethylcyclohexasiloxane

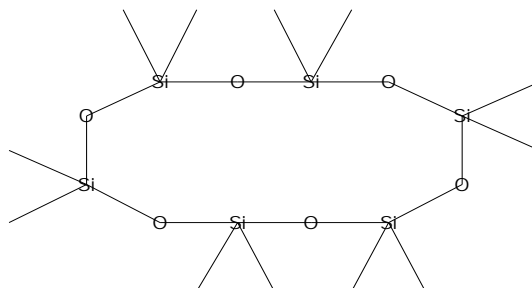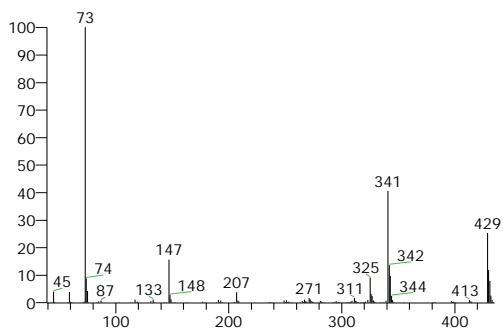

CYCLOHEXASILOXANE, DODECAMETHYL-  
Formula C<sub>12</sub>H<sub>36</sub>O<sub>6</sub>Si<sub>6</sub>, MW 444, CAS# 540-97-6, Entry# 584463  
2,2,4,4,6,6,8,8,10,10,12,12-DODECAMETHYLCYCLOHEXASILOXANE #

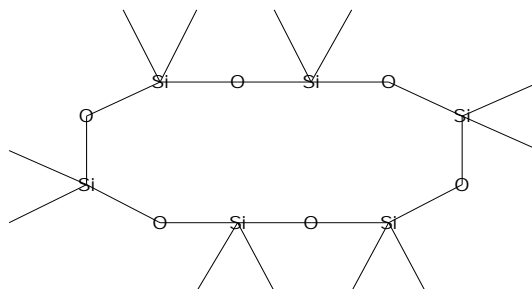

| RT    | Probability | Compound Name                             | SI  | RSI | Cas #    | Area % | Area      |
|-------|-------------|-------------------------------------------|-----|-----|----------|--------|-----------|
| 10.35 | 19.54       | Cyclohexasiloxane, dodecamethyl-          | 446 | 675 | 540-97-6 | 9.80   | 367019.64 |
| 10.35 | 19.54       | Cyclohexasiloxane, dodecamethyl-<br>(CAS) | 446 | 673 | 540-97-6 | 9.80   | 367019.64 |
| 10.35 | 19.54       | CYCLOHEXASILOXANE,<br>DODECAMETHYL-       | 443 | 683 | 540-97-6 | 9.80   | 367019.64 |

# ESOGU-ARUM

## Hit Spectrum

## Compound Structure

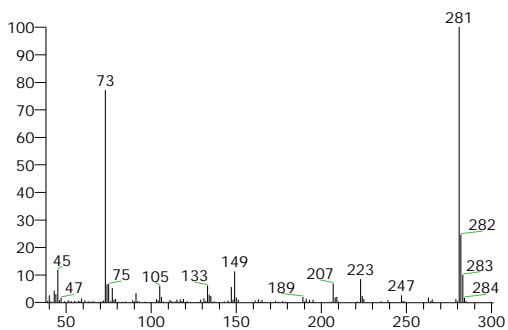

Benzoic acid, 3-methyl-2-trimethylsilyloxy-, trimethylsilyl ester  
Formula C<sub>14</sub>H<sub>24</sub>O<sub>3</sub>Si<sub>2</sub>, MW 296, CAS# NA, Entry# 173822

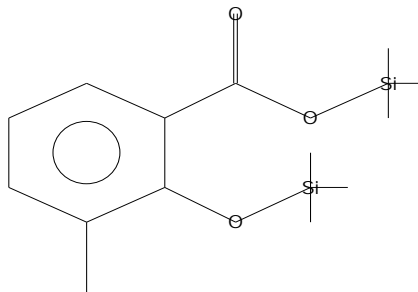

TRIMETHYLSILYL ESTER OF 3-METHYL-2-TRIMETHYLSILYLOXY-BENZOIC ACID  
Formula C<sub>14</sub>H<sub>24</sub>O<sub>3</sub>Si<sub>2</sub>, MW 296, CAS# NA, Entry# 364618

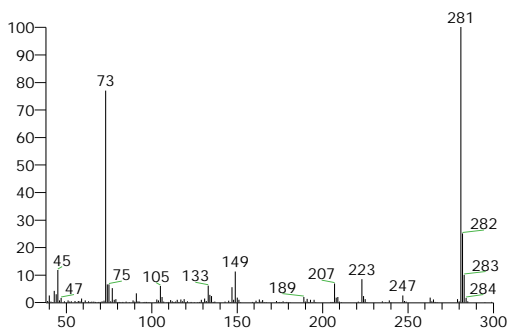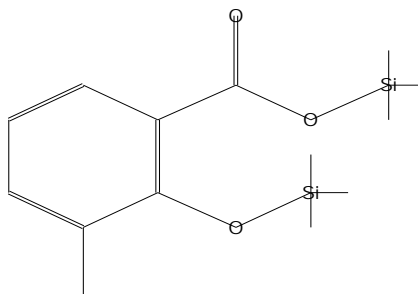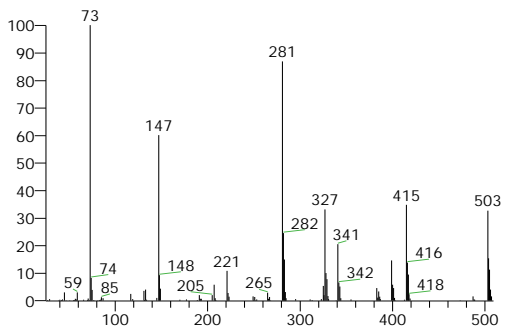

Cycloheptasiloxane, tetradecamethyl-  
Formula C<sub>14</sub>H<sub>42</sub>O<sub>7</sub>Si<sub>7</sub>, MW 518, CAS# 107-50-6, Entry# 37487  
2,2,4,4,6,6,8,8,10,10,12,12,14,14-Tetradecamethylcycloheptasiloxane #

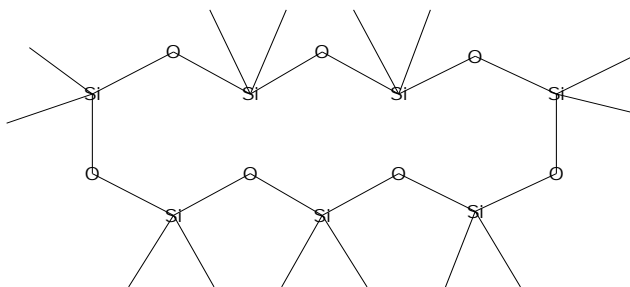

| RT    | Probability | Compound Name                                                           | SI  | RSI | Cas #    | Area % | Area      |
|-------|-------------|-------------------------------------------------------------------------|-----|-----|----------|--------|-----------|
| 14.43 | 6.91        | Benzoic acid,<br>3-methyl-2-trimethylsilyloxy-,<br>trimethylsilyl ester | 451 | 577 | NA       | 18.14  | 679416.89 |
| 14.43 | 6.91        | TRIMETHYLSILYL ESTER OF<br>3-METHYL-2-TRIMETHYLSILOX<br>Y-BENZOIC ACID  | 451 | 576 | NA       | 18.14  | 679416.89 |
| 14.43 | 5.15        | Cycloheptasiloxane, tetradecamethyl-                                    | 443 | 596 | 107-50-6 | 18.14  | 679416.89 |

# ESOGU-ARUM

Hit Spectrum

Compound Structure

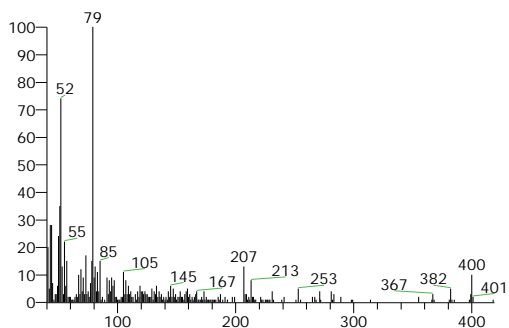

Pregnan-3,11,20,21-tetrol, cyclic 20,21-(butyl boronate), (3a,5a,11a,20R)-  
Formula C<sub>25</sub>H<sub>43</sub>BO<sub>4</sub>, MW 418, CAS# 55556-74-6, Entry# 41592  
17-(2-Butyl-1,3,2-dioxaborolan-4-yl)androstane-3,11-diol #

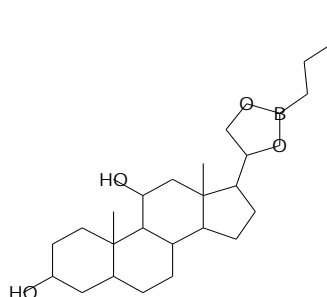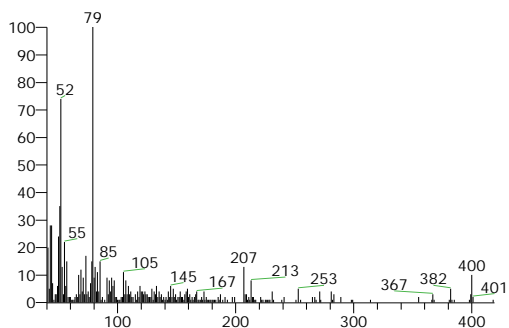

Pregnan-3,11,20,21-tetrol, cyclic 20,21-(butyl boronate), (3a,5a,11a,20R)- (CAS)  
Formula C<sub>25</sub>H<sub>43</sub>BO<sub>4</sub>, MW 418, CAS# 55556-74-6, Entry# 562492  
5a-PREGNAN-3a,11a,20a,21-TETROL BUTYL BORONATE

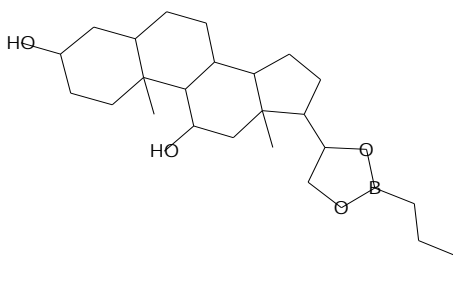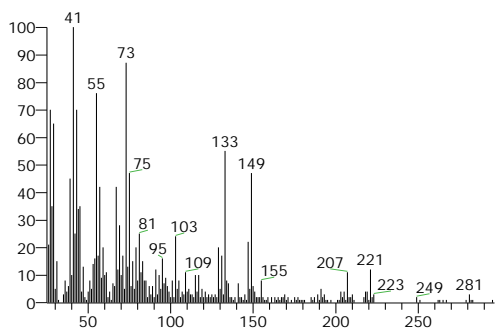

9,12,15-Octadecatrienoic acid, 2-[(trimethylsilyl)oxy]-1-[[[(trimethylsilyl)oxy]methyl]ethyl ester], (Z,Z,Z)-  
Formula C<sub>27</sub>H<sub>52</sub>O<sub>4</sub>Si<sub>2</sub>, MW 496, CAS# 55521-23-8, Entry# 3312  
2-[(Trimethylsilyl)oxy]-1-[[[(trimethylsilyl)oxy]methyl]ethyl (9E,12E,15E)-9,12,15-octadecatrienoate #

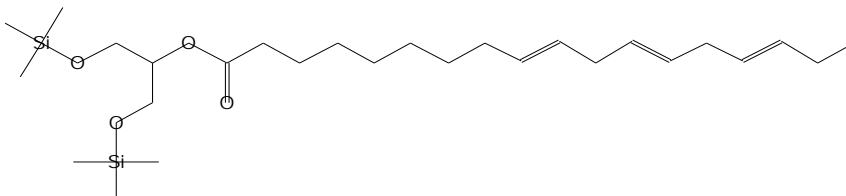

| RT    | Probability | Compound Name                                                                                                 | SI  | RSI | Cas #      | Area % | Area      |
|-------|-------------|---------------------------------------------------------------------------------------------------------------|-----|-----|------------|--------|-----------|
| 18.20 | 9.02        | Pregnan-3,11,20,21-tetrol, cyclic 20,21-(butyl boronate), (3a,5a,11a,20R)-                                    | 435 | 497 | 55556-74-6 | 6.60   | 247113.44 |
| 18.20 | 9.02        | Pregnan-3,11,20,21-tetrol, cyclic 20,21-(butyl boronate), (3a,5a,11a,20R)- (CAS)                              | 435 | 497 | 55556-74-6 | 6.60   | 247113.44 |
| 18.20 | 7.09        | 9,12,15-Octadecatrienoic acid, 2-[(trimethylsilyl)oxy]-1-[[[(trimethylsilyl)oxy]methyl]ethyl ester], (Z,Z,Z)- | 429 | 532 | 55521-23-8 | 6.60   | 247113.44 |

# ESOGU-ARUM

Hit Spectrum

Compound Structure

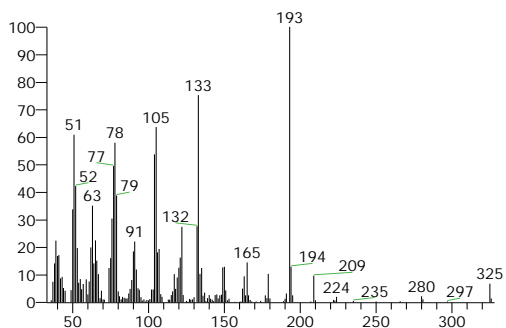

3-(1H-INDAZOL-6-YLAMINO)-6,7-DIMETHOXY-3H-ISOBENZOFURAN-1-ONE  
Formula C<sub>17</sub>H<sub>15</sub>N<sub>3</sub>O<sub>4</sub>, MW 325, CAS# NA, Entry# 426046  
3-(1H-INDAZOL-6-YLAMINO)-6,7-DIMETHOXY-2-BENZOFURAN-1(3H)-ONE

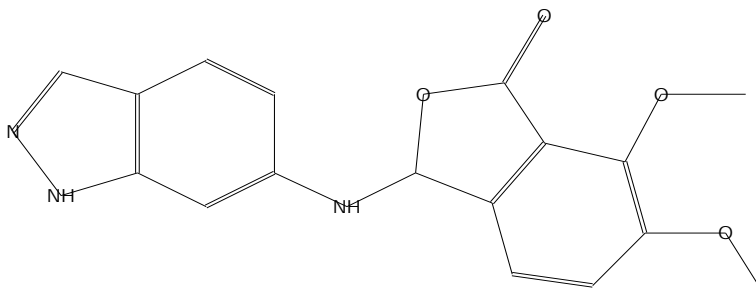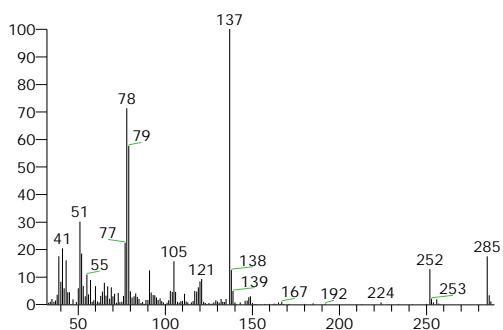

N-(2,5-Dimethyl-phenyl)-2-(pyridin-2-ylamino)-2-thioxo-acetamide  
Formula C<sub>15</sub>H<sub>15</sub>N<sub>3</sub>O<sub>2</sub>S, MW 285, CAS# NA, Entry# 340953  
N-(2,5-Dimethylphenyl)-2-(2-pyridinylamino)-2-thioxoacetamide

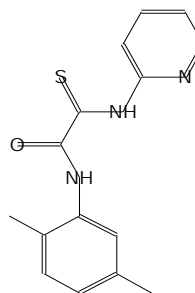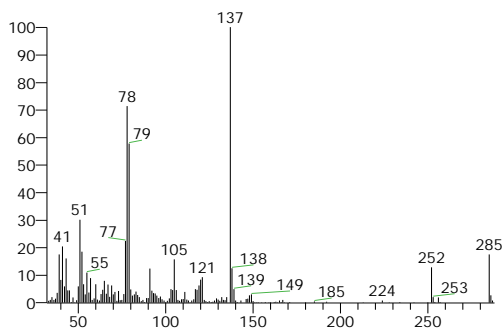

N-(2,5-Dimethyl-phenyl)-2-(pyridin-2-ylamino)-2-thioxo-acetamide  
Formula C<sub>15</sub>H<sub>15</sub>N<sub>3</sub>O<sub>2</sub>S, MW 285, CAS# NA, Entry# 99711

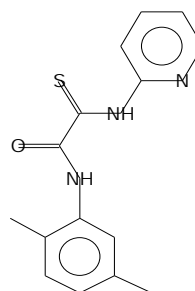

| RT    | Probability | Compound Name                                                     | SI  | RSI | Cas # | Area % | Area      |
|-------|-------------|-------------------------------------------------------------------|-----|-----|-------|--------|-----------|
| 42.11 | 9.29        | 3-(1H-INDAZOL-6-YLAMINO)-6,7-DIMETHOXY-3H-ISOBENZOFURAN-1-ONE     | 503 | 596 | NA    | 10.12  | 379308.16 |
| 42.11 | 7.85        | N-(2,5-Dimethyl-phenyl)-2-(pyridin-2-yl amino)-2-thioxo-acetamide | 499 | 612 | NA    | 10.12  | 379308.16 |
| 42.11 | 6.93        | N-(2,5-Dimethyl-phenyl)-2-(pyridin-2-yl amino)-2-thioxo-acetamide | 496 | 609 | NA    | 10.12  | 379308.16 |

# ESOGU-ARUM

Hit Spectrum

Compound Structure

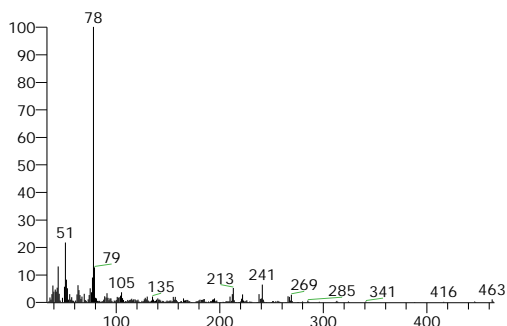

Formula C<sub>22</sub>H<sub>17</sub>N<sub>5</sub>O<sub>7</sub>, MW 463, CAS# NA, Entry# 597950

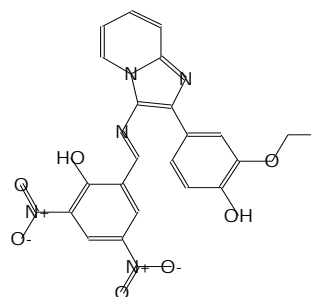

3,6-Dimethoxy-2,5-dinitrobenzaldehyde oxime  
Formula C<sub>9</sub>H<sub>9</sub>N<sub>3</sub>O<sub>7</sub>, MW 271, CAS# NA, Entry# 16748

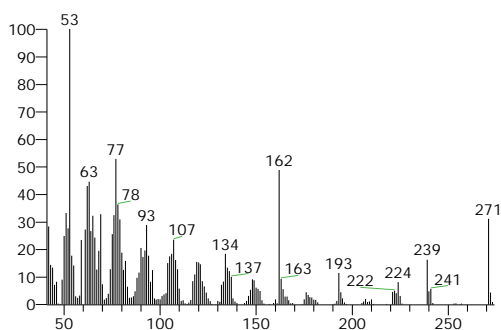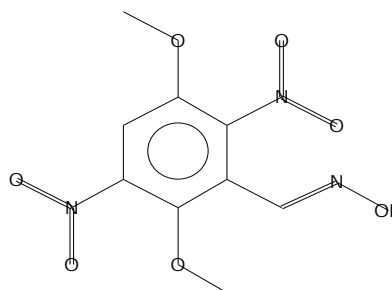

methyl 2-pyridyl ketone 4-[2-pyridyl]-3-thiosemicarbazone  
Formula C<sub>13</sub>H<sub>13</sub>N<sub>5</sub>S, MW 271, CAS# 70619-05-5, Entry# 41366  
(1E)-1-(3-Pyridinyl)ethanone N-(2-pyridinyl)thiosemicarbazone #

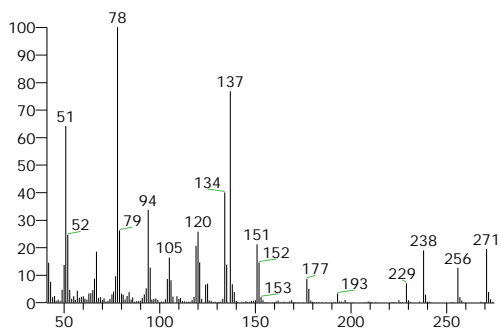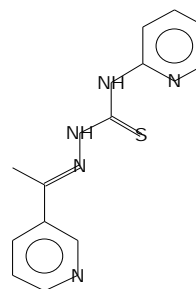

| RT    | Probability | Compound Name                                                                              | SI  | RSI | Cas #      | Area % | Area      |
|-------|-------------|--------------------------------------------------------------------------------------------|-----|-----|------------|--------|-----------|
| 43.67 | 12.26       | 2-([2-(3-ETHOXY-4-HYDROXYPHENYL)IMIDAZO[1,2-A]PYRIDIN-3-YL]IMINO)METHYL)-4,6-DINITROPHENOL | 505 | 604 | NA         | 6.25   | 234141.06 |
| 43.67 | 8.65        | 3,6-Dimethoxy-2,5-dinitrobenzaldehyde oxime                                                | 495 | 624 | NA         | 6.25   | 234141.06 |
| 43.67 | 7.31        | methyl 2-pyridyl ketone 4-[2-pyridyl]-3-thiosemicarbazone                                  | 491 | 596 | 70619-05-5 | 6.25   | 234141.06 |

# ESOGU-ARUM

## Hit Spectrum

## Compound Structure

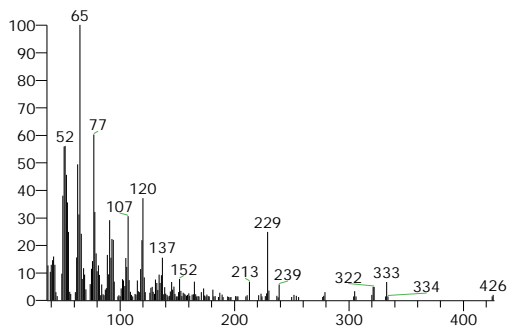

7,12-Dihydro-6,7-bis(4-hydroxyphenyl)-6H-[1,2,4]triazolo[1',5':1,2]pyrimido[5,4-c]chromen-2-ol  
Formula C<sub>24</sub>H<sub>18</sub>N<sub>4</sub>O<sub>4</sub>, MW 426, CAS# NA, Entry# 27977

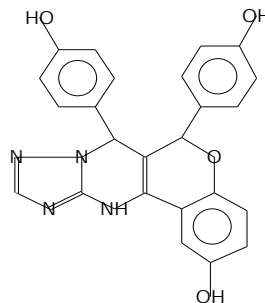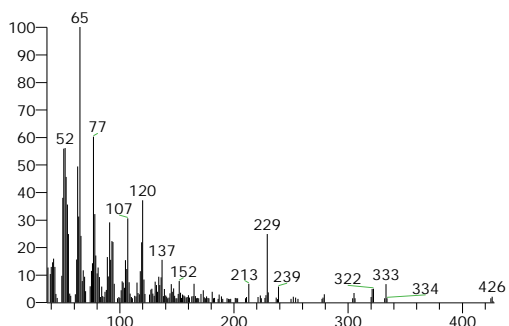

7,12-Dihydro-6,7-bis(4-hydroxyphenyl)-6H-[1,2,4]triazolo[1',5':1,2]pyrimido[5,4-c]chromen-2-ol  
Formula C<sub>24</sub>H<sub>18</sub>N<sub>4</sub>O<sub>4</sub>, MW 426, CAS# NA, Entry# 569540  
7,12-DIHYDRO-6,7-BIS(4-HYDROXYPHENYL)-6H-[1,2,4]TRIAZOLO[1',5':1,

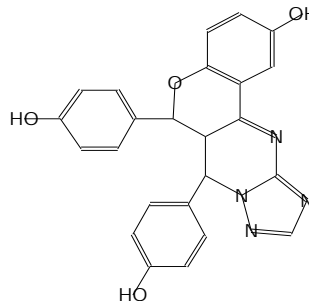

DIMETHYLDIPHENYLTETHYLIDYLPYRROLIDINE  
Formula C<sub>20</sub>H<sub>23</sub>N, MW 277, CAS# NA, Entry# 323094

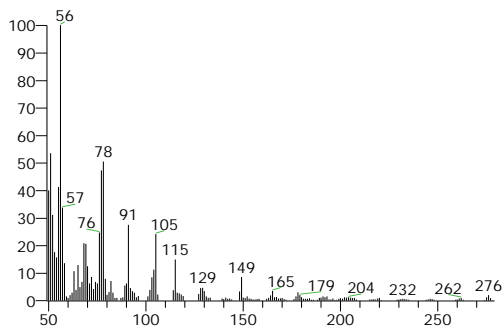

| RT    | Probability | Compound Name                                                                                  | SI  | RSI | Cas # | Area % | Area      |
|-------|-------------|------------------------------------------------------------------------------------------------|-----|-----|-------|--------|-----------|
| 43.88 | 8.20        | 7,12-Dihydro-6,7-bis(4-hydroxyphenyl)-6H-[1,2,4]triazolo[1',5':1,2]pyrimido[5,4-c]chromen-2-ol | 505 | 614 | NA    | 4.39   | 164328.81 |
| 43.88 | 7.88        | 7,12-Dihydro-6,7-bis(4-hydroxyphenyl)-6H-[1,2,4]triazolo[1',5':1,2]pyrimido[5,4-c]chromen-2-ol | 504 | 614 | NA    | 4.39   | 164328.81 |
| 43.88 | 5.25        | DIMETHYLDIPHENYLTETHYLIDYLPYRROLIDINE                                                          | 492 | 642 | NA    | 4.39   | 164328.81 |

# ESOGU-ARUM

Hit Spectrum

Compound Structure

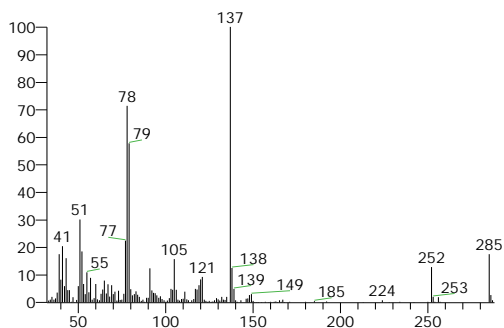

N-(2,5-Dimethyl-phenyl)-2-(pyridin-2-ylamino)-2-thioxo-acetamide  
Formula C<sub>15</sub>H<sub>15</sub>N<sub>3</sub>O<sub>2</sub>S, MW 285, CAS# NA, Entry# 99711

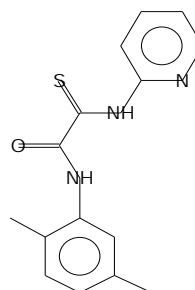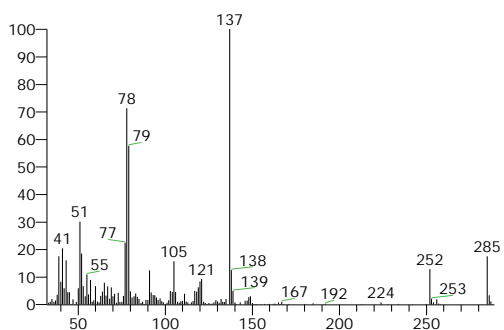

N-(2,5-Dimethyl-phenyl)-2-(pyridin-2-ylamino)-2-thioxo-acetamide  
Formula C<sub>15</sub>H<sub>15</sub>N<sub>3</sub>O<sub>2</sub>S, MW 285, CAS# NA, Entry# 340953  
N-(2,5-Dimethylphenyl)-2-(2-pyridinylamino)-2-thioxoacetamide

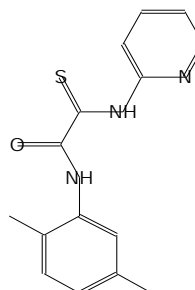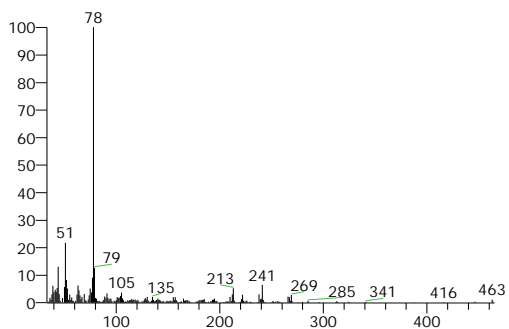

Formula C<sub>22</sub>H<sub>17</sub>N<sub>5</sub>O<sub>7</sub>, MW 463, CAS# NA, Entry# 597950

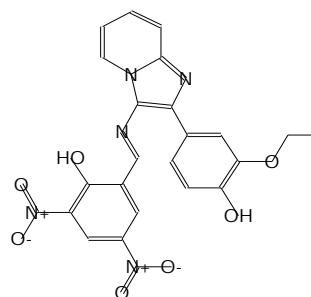

| RT    | Probability | Compound Name                                                                                  | SI  | RSI | Cas # | Area % | Area      |
|-------|-------------|------------------------------------------------------------------------------------------------|-----|-----|-------|--------|-----------|
| 47.49 | 9.40        | N-(2,5-Dimethyl-phenyl)-2-(pyridin-2-yl amino)-2-thioxo-acetamide                              | 512 | 675 | NA    | 4.26   | 159606.42 |
| 47.49 | 9.04        | N-(2,5-Dimethyl-phenyl)-2-(pyridin-2-yl amino)-2-thioxo-acetamide                              | 511 | 674 | NA    | 4.26   | 159606.42 |
| 47.49 | 6.38        | 2-((2-(3-ETHOXY-4-HYDROXYPHE NYL)IMIDAZO[1,2-A]PYRIDIN-3-YL )IMINO} METHYL)-4,6-DINITROPHE NOL | 501 | 595 | NA    | 4.26   | 159606.42 |



# ESOGU-ARUM

## Hit Spectrum

## Compound Structure

Formula C22H17N5O7, MW 463, CAS# NA, Entry# 597950



N-(2,5-Dimethyl-phenyl)-2-(pyridin-2-ylamino)-2-thioxo-acetamide  
Formula C15H15N3OS, MW 285, CAS# NA, Entry# 340953  
N-(2,5-Dimethylphenyl)-2-(2-pyridinylamino)-2-thioxoacetamide

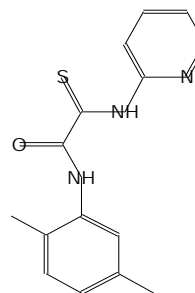

N-(2,5-Dimethyl-phenyl)-2-(pyridin-2-ylamino)-2-thioxo-acetamide  
Formula C15H15N3OS, MW 285, CAS# NA, Entry# 99711

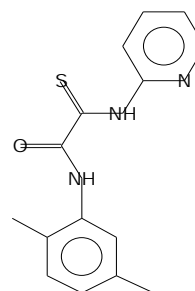

| RT    | Probability | Compound Name                                                                              | SI  | RSI | Cas # | Area % | Area      |
|-------|-------------|--------------------------------------------------------------------------------------------|-----|-----|-------|--------|-----------|
| 47.95 | 18.52       | 2-([2-(3-ETHOXY-4-HYDROXYPHENYL)IMIDAZO[1,2-A]PYRIDIN-3-YL]IMINO)METHYL)-4,6-DINITROPHENOL | 511 | 613 | NA    | 3.62   | 135532.80 |
| 47.95 | 11.22       | N-(2,5-Dimethyl-phenyl)-2-(pyridin-2-ylamino)-2-thioxo-acetamide                           | 496 | 675 | NA    | 3.62   | 135532.80 |
| 47.95 | 10.35       | N-(2,5-Dimethylphenyl)-2-(2-pyridinylamino)-2-thioxoacetamide                              | 494 | 674 | NA    | 3.62   | 135532.80 |

# ESOGU-ARUM

Hit Spectrum

Compound Structure

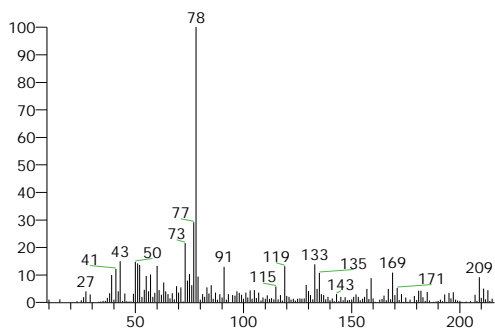

Benzoic acid, 3,4,5-trihydroxy-, propyl ester (CAS)  
Formula C<sub>10</sub>H<sub>12</sub>O<sub>5</sub>, MW 212, CAS# 121-79-9, Entry# 168871  
Nipa 49

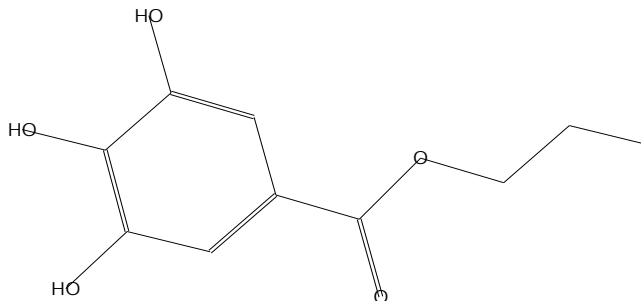

N-(2,5-Dimethyl-phenyl)-2-(pyridin-2-ylamino)-2-thioxo-acetamide  
Formula C<sub>15</sub>H<sub>15</sub>N<sub>3</sub>O<sub>2</sub>S, MW 285, CAS# NA, Entry# 340953  
N-(2,5-Dimethylphenyl)-2-(2-pyridinylamino)-2-thioxoacetamide

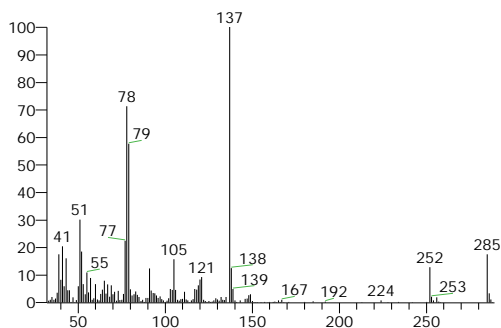

Formula C<sub>22</sub>H<sub>17</sub>N<sub>5</sub>O<sub>7</sub>, MW 463, CAS# NA, Entry# 597950

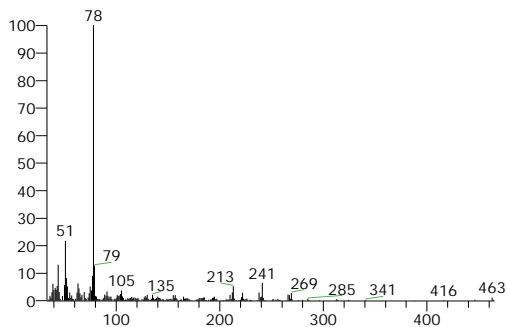

| RT    | Probability | Compound Name                                                                               | SI  | RSI | Cas #    | Area % | Area      |
|-------|-------------|---------------------------------------------------------------------------------------------|-----|-----|----------|--------|-----------|
| 48.26 | 7.80        | Benzoic acid, 3,4,5-trihydroxy-, propyl ester (CAS)                                         | 514 | 621 | 121-79-9 | 6.90   | 258352.68 |
| 48.26 | 5.50        | N-(2,5-Dimethyl-phenyl)-2-(pyridin-2-yl amino)-2-thioxo-acetamide                           | 504 | 651 | NA       | 6.90   | 258352.68 |
| 48.26 | 5.08        | 2-({[2-(3-ETHOXY-4-HYDROXYPHENYL)IMIDAZO[1,2-A]PYRIDIN-3-YL]IMINO}METHYL)-4,6-DINITROPHENOL | 502 | 581 | NA       | 6.90   | 258352.68 |

# ESOGU-ARUM

## Hit Spectrum

## Compound Structure

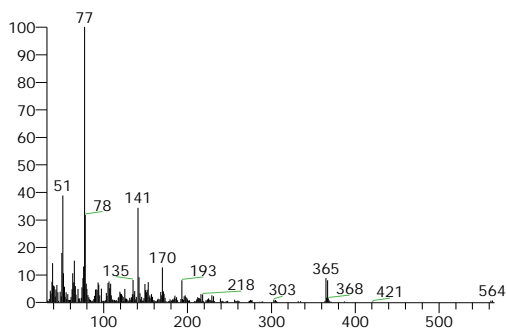

Formula C<sub>22</sub>H<sub>19</sub>BrN<sub>4</sub>O<sub>7</sub>S, MW 562, CAS# NA, Entry# 636813

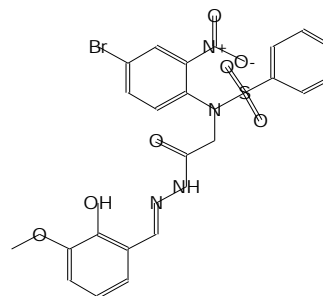

N-(2,5-Dimethyl-phenyl)-2-(pyridin-2-ylamino)-2-thioxo-acetamide  
Formula C<sub>15</sub>H<sub>15</sub>N<sub>3</sub>O<sub>2</sub>S, MW 285, CAS# NA, Entry# 99711

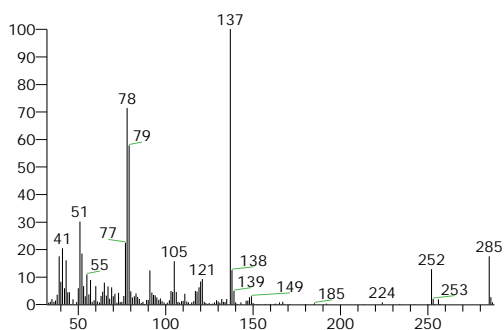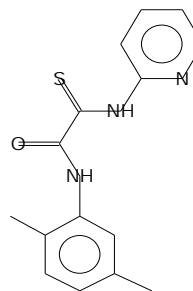

N-(2,5-Dimethyl-phenyl)-2-(pyridin-2-ylamino)-2-thioxo-acetamide  
Formula C<sub>15</sub>H<sub>15</sub>N<sub>3</sub>O<sub>2</sub>S, MW 285, CAS# NA, Entry# 340953  
N-(2,5-Dimethylphenyl)-2-(2-pyridinylamino)-2-thioxoacetamide

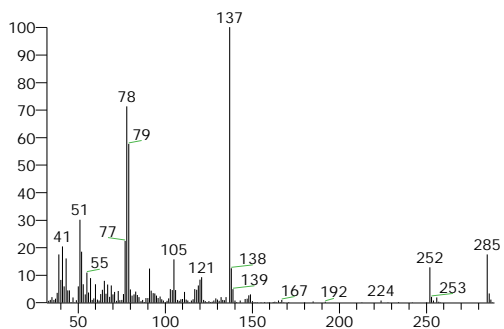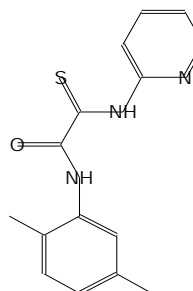

| RT    | Probability | Compound Name                                                                                              | SI  | RSI | Cas # | Area % | Area      |
|-------|-------------|------------------------------------------------------------------------------------------------------------|-----|-----|-------|--------|-----------|
| 48.81 | 4.69        | N-(4-BROMO-2-NITRO-PHENYL)-N-(2-HYDROXY-3-METHOXY-BENZYL IDENE-HYDRAZINOCARBONYLMETHYL)-BENZENESULFONAMIDE | 460 | 567 | NA    | 3.54   | 132514.84 |
| 48.81 | 3.96        | N-(2,5-Dimethyl-phenyl)-2-(pyridin-2-yl amino)-2-thioxo-acetamide                                          | 456 | 630 | NA    | 3.54   | 132514.84 |
| 48.81 | 3.96        | N-(2,5-Dimethyl-phenyl)-2-(pyridin-2-yl amino)-2-thioxo-acetamide                                          | 456 | 628 | NA    | 3.54   | 132514.84 |

# ESOGU-ARUM

## Hit Spectrum

## Compound Structure

Formula C22H17N5O7, MW 463, CAS# NA, Entry# 597950

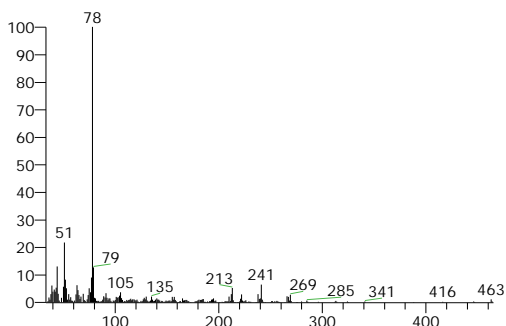

N-(2,5-Dimethyl-phenyl)-2-(pyridin-2-ylamino)-2-thioxo-acetamide  
Formula C15H15N3OS, MW 285, CAS# NA, Entry# 99711

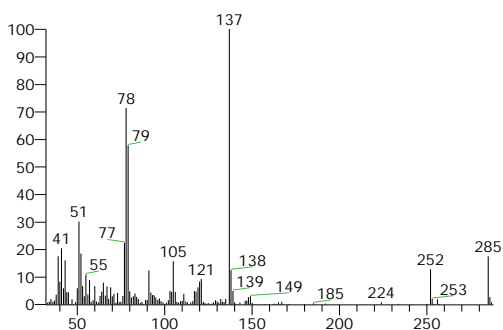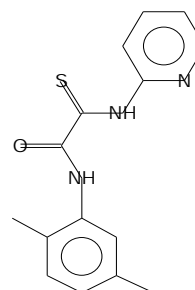

N-(2,5-Dimethyl-phenyl)-2-(pyridin-2-ylamino)-2-thioxo-acetamide  
Formula C15H15N3OS, MW 285, CAS# NA, Entry# 340953  
N-(2,5-Dimethylphenyl)-2-(2-pyridinylamino)-2-thioxoacetamide

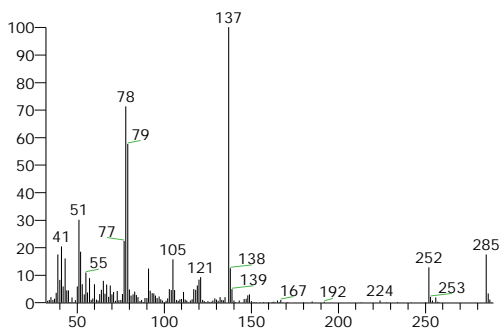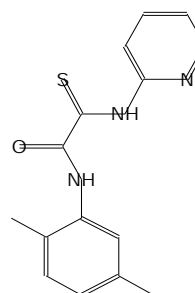

| RT    | Probability | Compound Name                                                                              | SI  | RSI | Cas # | Area % | Area      |
|-------|-------------|--------------------------------------------------------------------------------------------|-----|-----|-------|--------|-----------|
| 49.83 | 7.97        | 2-([2-(3-ETHOXY-4-HYDROXYPHENYL)IMIDAZO[1,2-A]PYRIDIN-3-YL]IMINO)METHYL)-4,6-DINITROPHENOL | 465 | 576 | NA    | 6.47   | 242331.76 |
| 49.83 | 7.35        | N-(2,5-Dimethyl-phenyl)-2-(pyridin-2-yl amino)-2-thioxo-acetamide                          | 463 | 643 | NA    | 6.47   | 242331.76 |
| 49.83 | 7.35        | N-(2,5-Dimethyl-phenyl)-2-(pyridin-2-yl amino)-2-thioxo-acetamide                          | 463 | 641 | NA    | 6.47   | 242331.76 |

# ESOGU-ARUM

Hit Spectrum

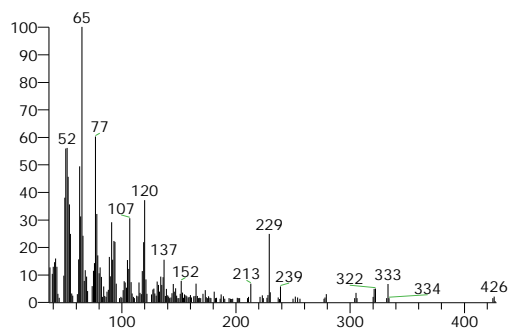

Compound Structure

7,12-Dihydro-6,7-bis(4-hydroxyphenyl)-6H-[1,2,4]triazolo[1',5':1,2]pyrimido[5,4-c]chromen-2-ol  
Formula C<sub>24</sub>H<sub>18</sub>N<sub>4</sub>O<sub>4</sub>, MW 426, CAS# NA, Entry# 569540  
7,12-DIHYDRO-6,7-BIS(4-HYDROXYPHENYL)-6H-[1,2,4]TRIAZOLO[1',5':1,

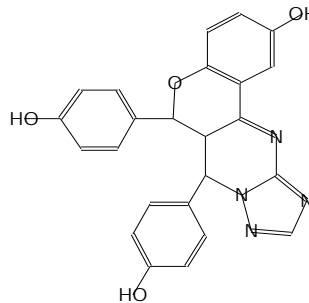

Formula C<sub>22</sub>H<sub>17</sub>N<sub>5</sub>O<sub>3</sub>S, MW 431, CAS# NA, Entry# 574442

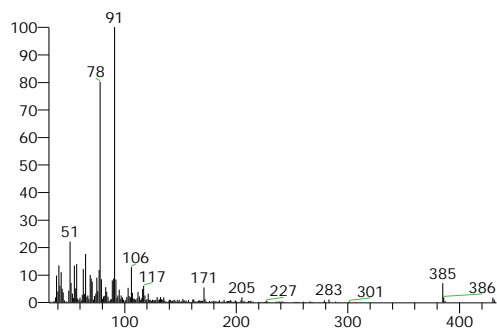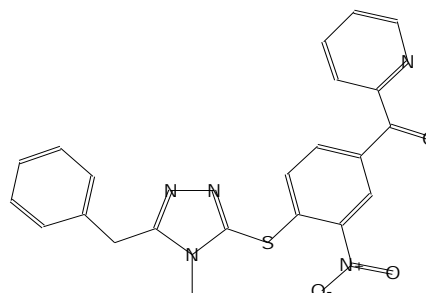

7,12-Dihydro-6,7-bis(4-hydroxyphenyl)-6H-[1,2,4]triazolo[1',5':1,2]pyrimido[5,4-c]chromen-2-ol  
Formula C<sub>24</sub>H<sub>18</sub>N<sub>4</sub>O<sub>4</sub>, MW 426, CAS# NA, Entry# 27977

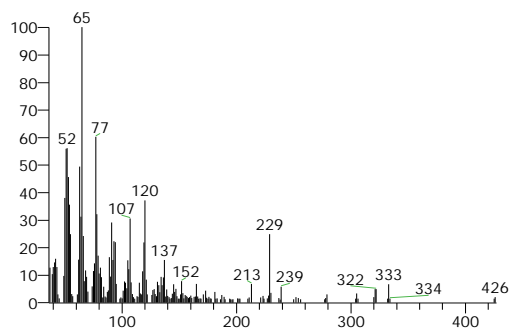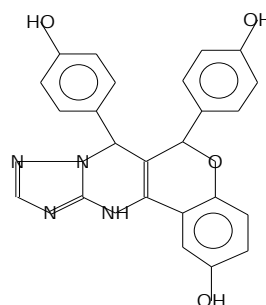

| RT    | Probability | Compound Name                                                                                   | SI  | RSI | Cas # | Area % | Area      |
|-------|-------------|-------------------------------------------------------------------------------------------------|-----|-----|-------|--------|-----------|
| 52.35 | 9.29        | 7,12-Dihydro-6,7-bis(4-hydroxyphenyl)-6H-[1,2,4]triazolo[1',5':1,2]pyrimido[5,4-c]chromen-2-ol  | 491 | 653 | NA    | 4.47   | 167401.60 |
| 52.35 | 7.49        | METHANONE, [4-[[4-METHYL-5-(PHENYLMETHYL)-4H-1,2,4-TRIAZOL-3-YL]THIO]-3-NITROPHENYL]2-PYRIDINYL | 486 | 580 | NA    | 4.47   | 167401.60 |
| 52.35 | 7.19        | 7,12-Dihydro-6,7-bis(4-hydroxyphenyl)-6H-[1,2,4]triazolo[1',5':1,2]pyrimido[5,4-c]chromen-2-ol  | 485 | 648 | NA    | 4.47   | 167401.60 |

# ESOGU-ARUM

Hit Spectrum

Compound Structure



Benzoic acid, 3,4,5-trihydroxy-, propyl ester (CAS)  
Formula C<sub>10</sub>H<sub>12</sub>O<sub>5</sub>, MW 212, CAS# 121-79-9, Entry# 168871  
Nipa 49

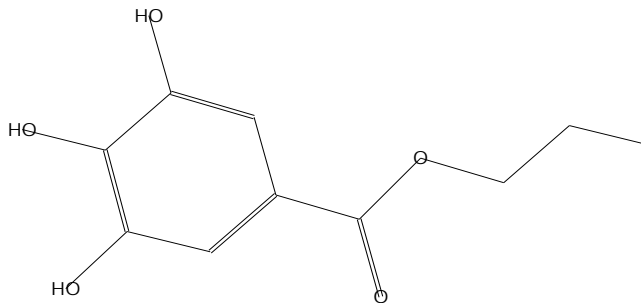

Formula C<sub>26</sub>H<sub>27</sub>NO<sub>7</sub>, MW 465, CAS# NA, Entry# 599252

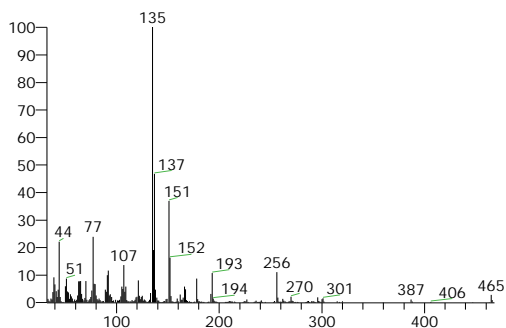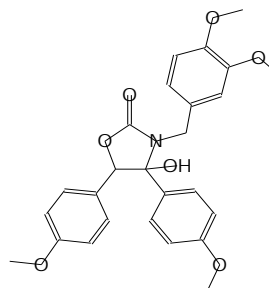

N-(2,5-Dimethylphenyl)-2-(pyridin-2-ylamino)-2-thioxoacetamide  
Formula C<sub>15</sub>H<sub>15</sub>N<sub>3</sub>O<sub>2</sub>S, MW 285, CAS# NA, Entry# 340953  
N-(2,5-Dimethylphenyl)-2-(2-pyridinylamino)-2-thioxoacetamide

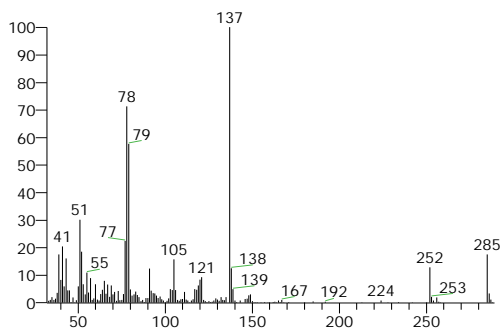

| RT    | Probability | Compound Name                                                                               | SI  | RSI | Cas #    | Area % | Area      |
|-------|-------------|---------------------------------------------------------------------------------------------|-----|-----|----------|--------|-----------|
| 52.74 | 8.16        | Benzoic acid, 3,4,5-trihydroxy-, propyl ester (CAS)                                         | 493 | 621 | 121-79-9 | 3.07   | 115071.08 |
| 52.74 | 6.42        | 2(3H)-OXAZOLONE, 3-[(3,4-DIMETHOXYPHENYL)METHYL]DIHYDRO-4-HYDROXY-4,5-BIS(4-METHOXYPHENYL)- | 487 | 570 | NA       | 3.07   | 115071.08 |
| 52.74 | 4.78        | N-(2,5-Dimethylphenyl)-2-(pyridin-2-yl amino)-2-thioxoacetamide                             | 479 | 638 | NA       | 3.07   | 115071.08 |

# ESOGU-ARUM

Hit Spectrum

Compound Structure

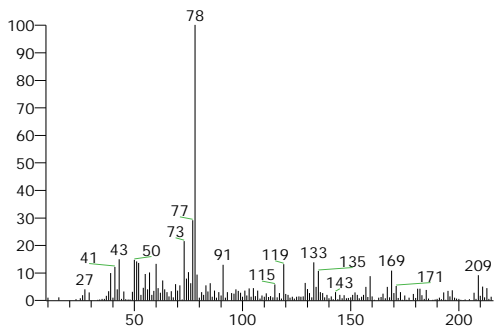

Benzoic acid, 3,4,5-trihydroxy-, propyl ester (CAS)  
Formula C10H12O5, MW 212, CAS# 121-79-9, Entry# 168871  
Nipa 49



DIMETHYLDIPHENYLTETHYLIDYLPYRROLIDINE  
Formula C20H23N, MW 277, CAS# NA, Entry# 323094

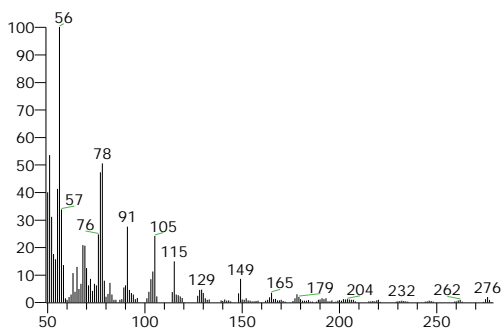

Formula C22H17N5O7, MW 463, CAS# NA, Entry# 597950

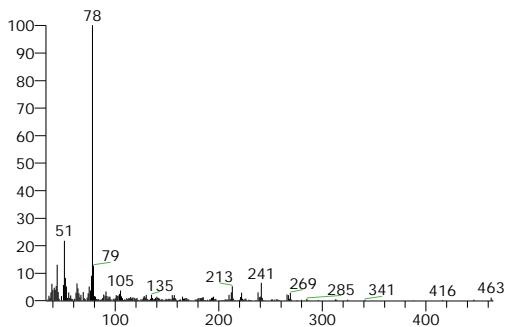

| RT    | Probability | Compound Name                                                                              | SI  | RSI | Cas #    | Area % | Area      |
|-------|-------------|--------------------------------------------------------------------------------------------|-----|-----|----------|--------|-----------|
| 53.17 | 8.52        | Benzoic acid, 3,4,5-trihydroxy-, propyl ester (CAS)                                        | 498 | 618 | 121-79-9 | 6.41   | 240147.20 |
| 53.17 | 5.84        | DIMETHYLDIPHENYLTETHYLIDYLPYRROLIDINE                                                      | 487 | 661 | NA       | 6.41   | 240147.20 |
| 53.17 | 4.93        | 2-([2-(3-ETHOXY-4-HYDROXYPHENYL)IMIDAZO[1,2-A]PYRIDIN-3-YL]IMINO}METHYL)-4,6-DINITROPHENOL | 483 | 568 | NA       | 6.41   | 240147.20 |

# ESOGU-ARUM

Hit Spectrum

Compound Structure



Benzoic acid, 3,4,5-trihydroxy-, propyl ester (CAS)  
Formula C10H12O5, MW 212, CAS# 121-79-9, Entry# 168871  
Nipa 49

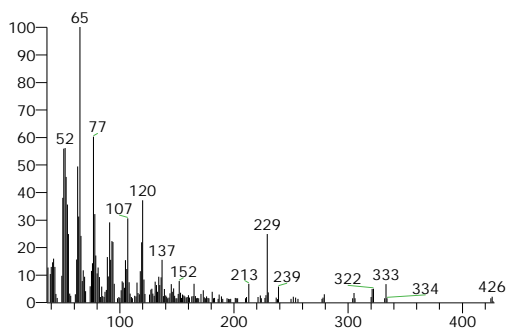

7,12-Dihydro-6,7-bis(4-hydroxyphenyl)-6H-[1,2,4]triazolo[1',5':1,2]pyrimido[5,4-c]chromen-2-ol  
Formula C24H18N4O4, MW 426, CAS# NA, Entry# 569540  
7,12-DIHYDRO-6,7-BIS(4-HYDROXYPHENYL)-6H-[1,2,4]TRIAZOLO[1',5':1,

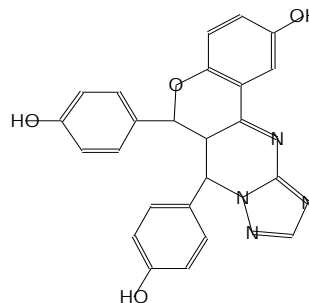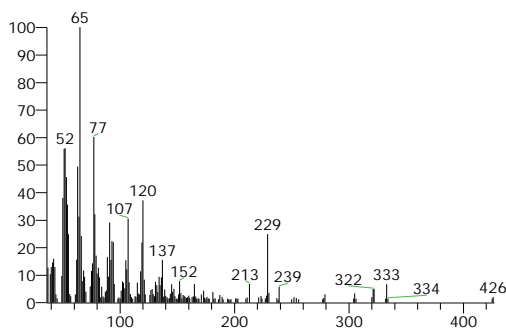

7,12-Dihydro-6,7-bis(4-hydroxyphenyl)-6H-[1,2,4]triazolo[1',5':1,2]pyrimido[5,4-c]chromen-2-ol  
Formula C24H18N4O4, MW 426, CAS# NA, Entry# 27977

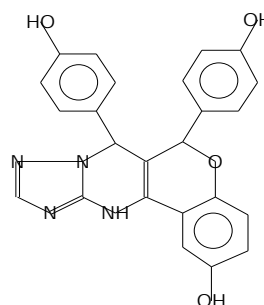

| RT    | Probability | Compound Name                                                                                  | SI  | RSI | Cas #    | Area % | Area      |
|-------|-------------|------------------------------------------------------------------------------------------------|-----|-----|----------|--------|-----------|
| 53.94 | 18.51       | Benzoic acid, 3,4,5-trihydroxy-, propyl ester (CAS)                                            | 517 | 661 | 121-79-9 | 5.98   | 224106.97 |
| 53.94 | 4.29        | 7,12-Dihydro-6,7-bis(4-hydroxyphenyl)-6H-[1,2,4]triazolo[1',5':1,2]pyrimido[5,4-c]chromen-2-ol | 477 | 627 | NA       | 5.98   | 224106.97 |
| 53.94 | 4.29        | 7,12-Dihydro-6,7-bis(4-hydroxyphenyl)-6H-[1,2,4]triazolo[1',5':1,2]pyrimido[5,4-c]chromen-2-ol | 477 | 626 | NA       | 5.98   | 224106.97 |
