# Supplementary material for: Antioxidant, Redox, and Immunomodulatory Effects of Hypericum perforatum in the Galleria mellonella: A 3R-Oriented Invertebrate Model
Source: MDPI journal article supplement (doi:10.3390/biomedicines14061297), 2026-06-07
Supplement: s1 [file Supplementary_Material S2.pdf › Supplementary_Material S2.pdf]

## Supplementary Material 2 (Statistical Analyses)

This supplementary file provides additional statistical analyses of total protein (TP), catalase (CAT), superoxide dismutase (SOD), and malondialdehyde (MDA) levels measured in *Galleria mellonella* hemolymph following *Hypericum perforatum* administration. Table numbering continues sequentially from the previously submitted Supplementary Table S1. In this context, the data is organized under the following sections: total protein levels are presented under Supplementary Table S1. Statistical analysis of total protein (TP) levels, catalase activity data under Supplementary Table S2. Statistical analysis of catalase (CAT) activity, superoxide dismutase activity results under Supplementary Table S3. Statistical analysis of superoxide dismutase (SOD) activity, and malondialdehyde levels under Supplementary Table S4. Statistical analysis of malondialdehyde (MDA) levels. Regarding immune responses, the parametric and non-parametric test results for each 4h encapsulation variable are summarized under Supplementary Table S5. Summary of parametric and nonparametric test results for each 4h encapsulation variable, while the non-parametric test results for each 24h encapsulation variable are provided under Supplementary Table S6. Summary of nonparametric test results for each 24h encapsulation variable. The statistical analyses of melanization responses, including descriptive statistics (mean  $\pm$  SD) after  $\text{asin}(\sqrt{\text{percentage}})$  transformation, are detailed under Supplementary Table S7. Statistical Analysis of Melanization Responses at 4 H Descriptive (mean  $\pm$  SD) after  $\text{asin}(\sqrt{\text{percentage}})$  transformation and Supplementary Table S8. Statistical Analysis of Melanization Responses at 24 H Descriptive statistics (mean  $\pm$  SD) after  $\text{asin}(\sqrt{\text{percentage}})$  transformation, respectively. Finally, the statistical evaluations of total hemocyte count results are presented under Supplementary Table S9. Statistical Analysis THC results.

### Supplementary Table S1. Statistical analysis of total protein (TP) levels

| Source of Variation | df | SS     | MS     | F     | p-value |
|---------------------|----|--------|--------|-------|---------|
| Between Groups      | 5  | 0.1210 | 0.0242 | 4.764 | 0.0005  |
| Within Groups       | 90 | 0.4568 | 0.0051 | -     | -       |
| Total               | 95 | 0.5778 | -      | -     | -       |

Shapiro–Wilk test indicated deviation from normality in DW ( $p = 0.008$ ) and HP-2 ( $p < 0.001$ ) groups. Tukey HSD revealed a significant difference between HP-2 and Control ( $p = 0.036$ ).

**Supplementary Table S2. Statistical analysis of catalase (CAT) activity**

| Source of Variation | df | SS                     | MS                     | F     | p-value |
|---------------------|----|------------------------|------------------------|-------|---------|
| Between Groups      | 5  | $2.151 \times 10^{-5}$ | $4.302 \times 10^{-6}$ | 0.254 | 0.939   |
| Within Groups       | 90 | $1.524 \times 10^{-3}$ | $1.693 \times 10^{-5}$ | -     | -       |
| Total               | 95 | $1.546 \times 10^{-3}$ | -                      | -     | -       |

All groups met normality assumptions (Shapiro–Wilk,  $p > 0.05$ ). No significant differences were detected; post-hoc analysis was not performed.

**Supplementary Table S3. Statistical analysis of superoxide dismutase (SOD) activity**

| Source of Variation | df | SS       | MS        | F     | p-value |
|---------------------|----|----------|-----------|-------|---------|
| Between Groups      | 5  | 0.000033 | 0.0000066 | 0.491 | 0.782   |
| Within Groups       | 90 | 0.001210 | 0.0000134 | -     | -       |
| Total               | 95 | 0.001243 | -         | -     | -       |

Shapiro–Wilk test confirmed normal distribution in all groups ( $p > 0.05$ ). Levene’s test indicated homogeneity of variances ( $F = 1.876$ ,  $p = 0.106$ ). No significant pairwise differences were observed.

**Supplementary Table S4. Statistical analysis of malondialdehyde (MDA) levels**

| Source of Variation | df | SS     | MS      | F     | p-value |
|---------------------|----|--------|---------|-------|---------|
| Between Groups      | 5  | 0.2481 | 0.04962 | 1.333 | 0.258   |
| Within Groups       | 90 | 3.347  | 0.03719 | -     | -       |
| Total               | 95 | 3.595  | -       | -     | -       |

All groups were normally distributed (Shapiro–Wilk,  $p > 0.05$ ). Levene’s test confirmed homogeneity of variances ( $F = 0.874$ ,  $p = 0.503$ ). No significant pairwise differences were detected.

**Supplementary Table S5. Summary of parametric and non parametric test results for each 4h encapsulation variable.**

| Variable | ANOVA p  | Kruskal-Wallis p | $\eta^2$ (effect size) |
|----------|----------|------------------|------------------------|
| None     | 0.0883   | 0.2038           | 0.099 (moderate)       |
| Weak     | 0.0025   | 0.00596          | 0.182 (large)          |
| Strong   | 0.000285 | 0.00250          | 0.226 (large)          |

**Post-hoc comparisons (Tukey HSD)**

- **Weak encapsulation:** The HP-3 group showed significantly higher weak encapsulation values than the DW and HP-2 groups ( $p < 0.05$  for both).
- **Strong encapsulation:** The HP-2 group showed significantly higher strong encapsulation values than the HP-3 and HP-4 groups ( $p < 0.01$  for both).

No other pairwise differences reached statistical significance.

**Note on statistical approach**

Because normality and homogeneity of variance assumptions were partially violated (notably for None and Strong), both parametric (ANOVA) and non-parametric (Kruskal-Wallis) tests were performed. The consistent results across both methods support the reliability of the findings.

**Reporting-ready statistical summary**

\*Kruskal-Wallis tests revealed significant differences among groups for Weak ( $\chi^2 = 16.33$ ,  $df = 5$ ,  $p = 0.006$ ) and Strong ( $\chi^2 = 18.39$ ,  $df = 5$ ,  $p = 0.002$ ) encapsulation, but not for None ( $p = 0.204$ ). Effect sizes ( $\eta^2$ ) were 0.18 and 0.23, respectively, indicating large effects. Tukey post-hoc comparisons showed that the HP-3 group had significantly higher Weak values than DW and HP-2, and the HP-2 group had significantly higher Strong values than HP-3 and HP-4.\*

**Supplementary Table S6. Summary of non parametric test results for each 24h encapsulation variable.**

| Variable | Kruskal-Wallis $\chi^2$ | df | p     | $\epsilon^2$ (effect size) |
|----------|-------------------------|----|-------|----------------------------|
| None     | 8.86                    | 5  | 0.115 | 0.05 (small)               |

| Variable | Kruskal-Wallis $\chi^2$ | df | p      | $\epsilon^2$ (effect size) |
|----------|-------------------------|----|--------|----------------------------|
| Weak     | 43.94                   | 5  | <0.001 | 0.44 (large)               |
| Strong   | 41.44                   | 5  | <0.001 | 0.41 (large)               |

#### Post-hoc comparisons (Dunn test with Bonferroni correction)

##### Weak encapsulation:

Significant pairwise differences ( $p < 0.05$ ) were as follows:

| Comparison        | Z value | Adjusted p | Direction        |
|-------------------|---------|------------|------------------|
| HP-1 vs HP-3      | -3.70   | 0.0032     | HP-3 > HP-1      |
| DW vs HP-4        | -4.47   | 0.0001     | HP-4 > DW        |
| HP-1 vs HP-4      | -5.70   | <0.0001    | HP-4 > HP-1      |
| HP-2 vs HP-4      | -4.59   | <0.0001    | HP-4 > HP-2      |
| HP-4 vs Untreated | 4.20    | 0.0004     | HP-4 > Untreated |

No other pairwise comparisons reached statistical significance. In particular, the difference between HP-3 and HP-4 was not significant.

##### Strong encapsulation:

Significant pairwise differences ( $p < 0.05$ ) were as follows:

| Comparison        | Z value | Adjusted p | Direction        |
|-------------------|---------|------------|------------------|
| HP-1 vs HP-3      | 3.70    | 0.0033     | HP-1 > HP-3      |
| DW vs HP-4        | 3.82    | 0.0020     | DW > HP-4        |
| HP-1 vs HP-4      | 5.91    | <0.0001    | HP-1 > HP-4      |
| HP-2 vs HP-4      | 4.55    | <0.0001    | HP-2 > HP-4      |
| HP-4 vs Untreated | -3.23   | 0.0189     | Untreated > HP-4 |

No other pairwise comparisons were statistically significant.

### Reporting-ready statistical summary

Kruskal-Wallis tests showed no significant differences among groups for None encapsulation ( $\chi^2 = 8.86$ ,  $df = 5$ ,  $p = 0.115$ ;  $\varepsilon^2 = 0.05$ ). In contrast, highly significant differences were observed for Weak ( $\chi^2 = 43.94$ ,  $df = 5$ ,  $p < 0.001$ ;  $\varepsilon^2 = 0.44$ ) and Strong ( $\chi^2 = 41.44$ ,  $df = 5$ ,  $p < 0.001$ ;  $\varepsilon^2 = 0.41$ ). Dunn post-hoc tests with Bonferroni correction revealed that HP-4 had significantly higher Weak values than Untreated, DW, HP-1, and HP-2 (all  $p < 0.001$ ), and HP-3 had higher Weak values than HP-1 ( $p = 0.003$ ). For Strong encapsulation, HP-4 had significantly lower values than DW, HP-1, HP-2, and Untreated (all  $p < 0.02$ ), and HP-1 had higher Strong values than HP-3 ( $p = 0.003$ ).

### Supplementary Table S7. Statistical Analysis of Melanization Responses at 4 H Descriptive statistics (mean $\pm$ SD) after $\text{asin}(\sqrt{\text{percentage}})$ transformation.

| Group     | None (n=16)         | Melanized (n=16)    |
|-----------|---------------------|---------------------|
| Untreated | 0.2991 $\pm$ 0.1871 | 0.8278 $\pm$ 0.2716 |
| DW        | 0.2845 $\pm$ 0.1112 | 0.8176 $\pm$ 0.1577 |
| HP-1      | 0.3018 $\pm$ 0.1875 | 0.8207 $\pm$ 0.2637 |
| HP-2      | 0.1889 $\pm$ 0.1128 | 0.9741 $\pm$ 0.1891 |
| HP-3      | 0.3514 $\pm$ 0.2364 | 0.7972 $\pm$ 0.3740 |
| HP-4      | 0.3322 $\pm$ 0.2353 | 0.8068 $\pm$ 0.3284 |

### Assumption checks (Levene and Shapiro-Wilk tests).

| Variable  | Levene test (p) | Homogeneous variance? | Shapiro-Wilk (p) | Normality assumption |
|-----------|-----------------|-----------------------|------------------|----------------------|
| None      | 0.2248          | Yes                   | 0.0028           | Violated             |
| Melanized | 0.3444          | Yes                   | 0.0125           | Violated             |

### ANOVA results.

| Variable  | Sum of squares (group) | df | Mean square | F value | p value | Significant? |
|-----------|------------------------|----|-------------|---------|---------|--------------|
| None      | 0.2557                 | 5  | 0.05114     | 1.486   | 0.202   | No           |
| Melanized | 0.3510                 | 5  | 0.07017     | 0.932   | 0.464   | No           |

#### Kruskal-Wallis test results (non-parametric).

| Variable  | $\chi^2$ | df | p value | Significant? |
|-----------|----------|----|---------|--------------|
| None      | 7.7325   | 5  | 0.1716  | No           |
| Melanized | 7.7325   | 5  | 0.1716  | No           |

*Note: The identical  $\chi^2$  and p values for both variables reflect the ranking structure of the data and do not affect the conclusion of no significant difference.*

One-way ANOVA revealed no significant differences among the six groups (Untreated, DW, HP-1, HP-2, HP-3, HP-4) for None ( $F(5,90) = 1.486$ ,  $p = 0.202$ ) or Melanized ( $F(5,90) = 0.932$ ,  $p = 0.464$ ). Although normality was violated (Shapiro-Wilk  $p < 0.05$ ), variances were homogeneous (Levene  $p > 0.05$ ), and ANOVA is considered robust under these conditions. Kruskal-Wallis tests confirmed the lack of significant differences for None ( $\chi^2 = 7.73$ ,  $df = 5$ ,  $p = 0.172$ ) and Melanized ( $\chi^2 = 7.73$ ,  $df = 5$ ,  $p = 0.172$ ). Because no overall significance was found, post-hoc comparisons were not performed.

### Supplementary Table S8. Statistical Analysis of Melanization Responses at 24 H Descriptive statistics (mean $\pm$ SD) after $\text{asin}(\sqrt{\text{percentage}})$ transformation.

#### 1. None Melanized

##### Assumption checks:

- Levene test for homogeneity of variance:  $p = 4.09\text{e-}06$  (violated)
- Shapiro-Wilk test for normality of residuals:  $p = 5.20\text{e-}05$  (violated)

Due to violated assumptions, a non-parametric Kruskal-Wallis test was used.

##### Kruskal-Wallis test:

$\chi^2 = 19.11$ ,  $df = 5$ ,  $p = 0.00183 \rightarrow$  Significant difference among groups.

**Effect size ( $\epsilon^2$ , corrected):**  $\epsilon^2 = 0.1568$  (moderate-to-large)

**Dunn post-hoc test (Holm adjustment):**

Significant pairwise differences (p.adj < 0.05):

| Comparison       | p.adj  | Direction        |
|------------------|--------|------------------|
| HP-1 – Untreated | 0.0052 | HP-1 < Untreated |
| HP-4 – Untreated | 0.0011 | HP-4 < Untreated |

No other pairwise comparisons were significant.

**Descriptive statistics (None, asin-transformed):**

| Group     | Mean ± SD       | Median | n  |
|-----------|-----------------|--------|----|
| Untreated | 0.3634 ± 0.2448 | 0.3972 | 16 |
| DW        | 0.1059 ± 0.0717 | 0.0973 | 16 |
| HP-1      | 0.0809 ± 0.0771 | 0.0871 | 16 |
| HP-2      | 0.1222 ± 0.1112 | 0.0982 | 16 |
| HP-3      | 0.1147 ± 0.0823 | 0.1343 | 16 |
| HP-4      | 0.0683 ± 0.0683 | 0.0558 | 16 |

---

**2. Melanized Variable****Assumption checks:**

- Levene test for homogeneity of variance: p = 0.485 (satisfied)
- Shapiro-Wilk test for normality of residuals: p = 0.00014 (violated)

ANOVA was used because it is robust to moderate deviations from normality when variances are homogeneous.

**One-way ANOVA:**

F(5, 90) = 5.647, p = 0.000142 → Significant difference among groups.

**Effect size ( $\eta^2$ ):**  $\eta^2 = 0.2388$  (large)

**Tukey HSD post-hoc test:**

Significant pairwise differences (p.adj < 0.05):

| Comparison       | Mean difference | p.adj   | Direction        |
|------------------|-----------------|---------|------------------|
| DW – Untreated   | 0.3568          | 0.0088  | DW > Untreated   |
| HP-1 – Untreated | 0.4418          | 0.0005  | HP-1 > Untreated |
| HP-2 – Untreated | 0.3405          | 0.0144  | HP-2 > Untreated |
| HP-3 – Untreated | 0.3542          | 0.0095  | HP-3 > Untreated |
| HP-4 – Untreated | 0.4808          | 0.00012 | HP-4 > Untreated |

No other pairwise comparisons (e.g., DW vs HP-1, HP-2 vs HP-3) were significant. Thus, all treatment groups (DW, HP-1, HP-2, HP-3, HP-4) showed significantly higher Melanized values than the Untreated group, but did not differ among themselves.

**Descriptive statistics (Melanized, asin-transformed):**

| Group     | Mean ± SD       | Median | n  |
|-----------|-----------------|--------|----|
| Untreated | 0.8032 ± 0.4220 | 0.6613 | 16 |
| DW        | 1.1601 ± 0.2256 | 1.1265 | 16 |
| HP-1      | 1.2450 ± 0.2513 | 1.1507 | 16 |
| HP-2      | 1.1438 ± 0.2713 | 1.1245 | 16 |
| HP-3      | 1.1574 ± 0.2615 | 1.0476 | 16 |
| HP-4      | 1.2840 ± 0.2465 | 1.2355 | 16 |

---

For the None variable, a Kruskal-Wallis test revealed significant differences among groups ( $\chi^2 = 19.11$ , df = 5, p = 0.00183;  $\epsilon^2 = 0.1568$ ). Dunn post-hoc tests (Holm-adjusted) showed that HP-1 and HP-4 had significantly lower None values than the Untreated group (p = 0.0052 and p = 0.0011, respectively). No other pairwise differences were significant.

For the Melanized variable, a one-way ANOVA demonstrated significant differences among groups (F(5,90) = 5.647, p = 0.000142;  $\eta^2 = 0.2388$ ). Tukey HSD post-hoc tests indicated



that all treatment groups (DW, HP-1, HP-2, HP-3, HP-4) had significantly higher Melanized values than the Untreated group (all  $p < 0.05$ ), with no significant differences among the treatment groups themselves.

### Supplementary Table S9. Statistical Analysis THC results.

#### One-way Analysis of Variance (ANOVA) for treatment effects

| Source of Variation | df | SS        | MS      | F    | p-value |
|---------------------|----|-----------|---------|------|---------|
| Between Groups      | 5  | 35660.92  | 7132.18 | 5.36 | 0.00023 |
| Within Groups       | 90 | 119730.25 | 1330.34 | -    | -       |
| Total               | 95 | 155391.17 | -       | -    | -       |

#### Descriptive statistics of experimental groups ( per group)

| Group           | Mean () | SD    | SEM   |
|-----------------|---------|-------|-------|
| Untreated       | 208.19  | 15.56 | 3.89  |
| Distilled Water | 216.81  | 43.24 | 10.81 |
| HP-1            | 244.75  | 23.75 | 5.94  |
| HP-2            | 263.75  | 44.25 | 11.06 |
| HP-3            | 221.75  | 48.96 | 12.24 |
| HP-4            | 208.56  | 30.91 | 7.73  |

#### Statistical Notes and Assumptions

- **Normality & Homogeneity:** Data distribution was assessed using the Shapiro–Wilk test, confirming normality across all groups ( $p > 0.05$ ). Levene’s test indicated homogeneity of variances ( $p = 0.068$ ).
- **Effect Size:** The calculated Eta-squared ( $\eta^2 = 0.23$ ) indicates a large effect size, suggesting that treatment type explains approximately **22.95%** of the total variance.
- **Post Hoc Analysis:** Tukey HSD test revealed that the **HP-2** group was significantly higher than the Untreated ( $p = 0.001$ ), HP-4 ( $p = 0.001$ ), Distilled Water ( $p = 0.010$ ), and HP-3 ( $p = 0.027$ ) groups. Additionally, **HP-1** showed a significant increase

compared to the Untreated group ( $p=0.049$ ). No other significant differences were observed between the remaining groups ( $p>0.05$ ).
